# Supplementary material
Source: PubMed Central journal article supplement (PMC2805057)
Supplement: NIHMS158693-supplement-1.pdf [file NIHMS158693-supplement-1.pdf]

## Supplemental Figure 1

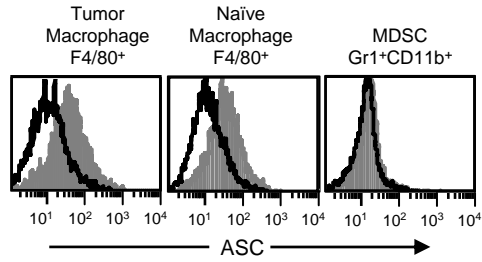

## Supplemental Figure 2

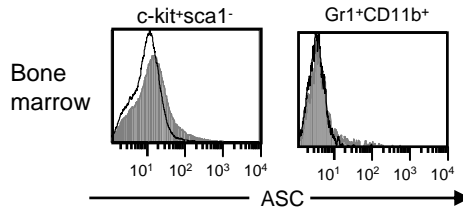

## Supplemental Figure 3

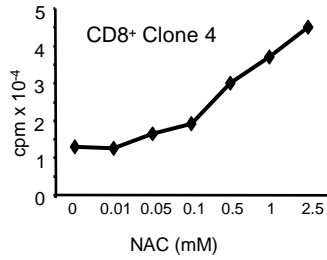

## Supplemental Figure 4

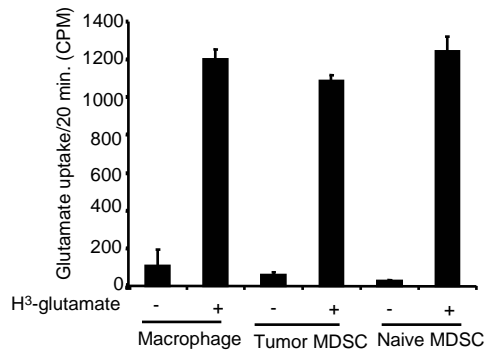

### Supplemental Table 1.

|                                     | Percent Cells |      |
|-------------------------------------|---------------|------|
|                                     | Without NAC   | NAC  |
| CD11b <sup>+</sup> Gr1 <sup>+</sup> | 88            | 87.5 |
| F4/80 <sup>+</sup> Gr1 <sup>-</sup> | 0.28          | 0.15 |
| CD11c <sup>+</sup> Gr1 <sup>-</sup> | 0.05          | 0.04 |
| CD80 <sup>+</sup> Gr1 <sup>-</sup>  | 0.33          | 0.26 |
| A <sup>d+</sup> Gr1 <sup>-</sup>    | 0.04          | 0.05 |

**Supplemental figure 1.** Absence of the ASC neutral amino acid transporter is limited to MDSC and is not shared with other myeloid cells in tumor-bearing mice. Blood MDSC (>94% Gr1<sup>+</sup>CD11b<sup>+</sup> cells) and peritoneal macrophages from tumor-free (>91% F4/80<sup>+</sup>) or 4T1 tumor-bearing (>74% F4/80<sup>+</sup>) BALB/c mice were stained for F4/80 and ASC, and the gated F4/80<sup>+</sup> population analyzed for ASC expression. MCF for control Ab is 20, 21, and 19; MCF for ASC Ab is 60, 50, and 26 for tumor macrophages, naïve macrophages, and MDSC, respectively.

**Supplemental figure 2.** Myeloid progenitor cells in the bone marrow express low levels of the ASC transporter. Bone marrow cells were harvested as described (1) from tumor-free mice and stained for Gr1, CD11b, c-kit, Sca-1, and ASC. Gated Gr1<sup>+</sup>CD11b<sup>+</sup> and c-kit<sup>+</sup>Sca-1<sup>-</sup> cells (myeloid progenitor cells; (2)) were analyzed for ASC.

**Supplemental figure 3.** Transgenic CD8<sup>+</sup> Clone 4 T cells were co-cultured with cognate peptide in the presence of 0-2.5 mM NAC. T cell activation was measured by tritiated thymidine uptake. Data are representative of two independent experiments.

**Supplemental figure 4.** Thioglycolate-induced peritoneal macrophages (>89% F4/80<sup>+</sup>), MDSC from naïve mice (>86% Gr1<sup>+</sup>CD11b<sup>+</sup>), and MDSC from mice with 4T1 tumors (> 90% Gr1<sup>+</sup>CD11b<sup>+</sup>) were cultured in sodium-free buffer for 20 min, followed by a 20 min incubation in buffer supplemented with <sup>3</sup>H-glutamate. Glutamate uptake was terminated by washing with cold buffer and cells were lysed and the lysates were counted for in tritiated glutamate. Data are from one of two independent experiments.

**Supplemental Table 1.** NAC does not cause MDSC differentiation. Leukocytes from the blood of BALB/c mice with 4T1 tumors (>91% Gr1<sup>+</sup>CD11b<sup>+</sup> cells) were cultured in serum-free HL-1 medium with or without 0.5 mM NAC. Cells were harvested after 16 hours, stained with mAbs to Gr1, CD11b, F4/80, CD11c, CD80, and I-A<sup>d</sup> and analyzed by flow cytometry. By day 3 of culture, 97.5% of the cells were dead as measured by trypan blue exclusion.

## References

1. Sinha P, Clements VK, Fulton AM, et al. Prostaglandin E2 promotes tumor progression by inducing myeloid-derived suppressor cells. *Cancer Res* 2007;67:4507-13.
2. Akashi K, Traver D, Miyamoto T, et al. A clonogenic common myeloid progenitor that gives rise to all myeloid lineages. *Nature* 2000;404:193-7.
